# Supplementary material for: A copper(II) paddle-wheel structure of tranexamic acid: di­chloro-tetra­kis­[μ-4-(ammonio­meth­yl)cyclo­hexane-1-carboxyl­ato-O,O′]dicopper(II) dichloride hexa­hydrate
Source: PubMed Central journal article supplement (PMC5730287; doi:10.1107/s2056989017012543), 2017-09-08

# Search Overview

**Search:** search5  
**Date/Time done:** Sun Aug 20 15:58:38 2017  
**Database(s):** CSD version 5.38 updates (Nov 2016)  
CSD version 5.38 (November 2016)  
CSD version 5.38 (November 2016)  
CSD version 5.38 updates (Feb 2017)  
CSD version 5.38 updates (May 2017)  
**Restriction Info:** No refcode restrictions applied  
**Filters:** None  
**Percentage Completed:** 100%  
**Number of Hits:** 17

**Single query used. Search found structures that:**

match

**Query 1**

**Query 1**

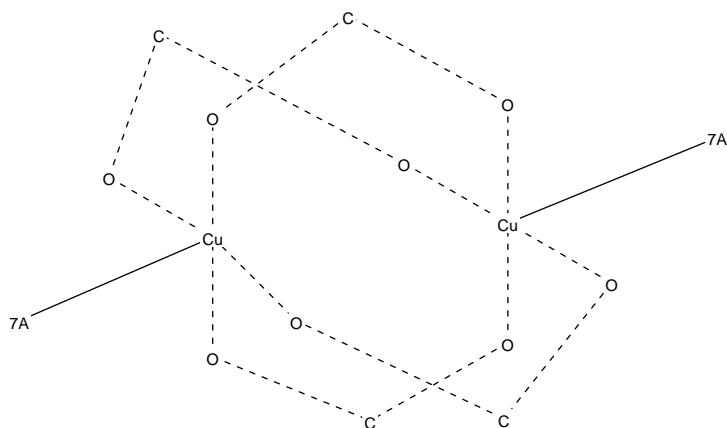

# Search: search5 (Sun Aug 20 15:58:38 2017): Hits 1-4

## FIWGAT

**Reference:** H.Nakagawa, Y.Kani, M.Tsuchimoto, S.Ohba, M.Hideaki, T.Tokii (1999) *Acta Crystallogr., Sect.C:Cryst.Struct.Commun.* **55**,882

**Formula:** C<sub>28</sub>H<sub>28</sub>Cl<sub>2</sub>Cu<sub>2</sub>N<sub>4</sub>O<sub>8</sub><sup>2+</sup>·2(Cl<sup>-</sup>)<sub>1</sub>·8(H<sub>2</sub>O)<sub>1</sub>

**Compound Name:** tetrakis(μ<sub>2</sub>-N-Methylpyridinium-3-carboxylate)-dichloro-di-copper(ii) dichloride octahydrate

**Synonym:** tetrakis(μ<sub>2</sub>-Trigonelline-O,O)-dichloro-di-copper(ii) dichloride octahydrate

**Space Group:** P-1 **Cell:** a 10.156(2) b 13.883(2) c 7.793(1)  
**Space Group No.:** 2 **(Å, °)** α 99.40(1) β 109.29(1) γ 75.57(1)

**R-Factor (%):** 4.30 **Temperature(K):** 295 **Density(g/cm<sup>3</sup>):** 1.596

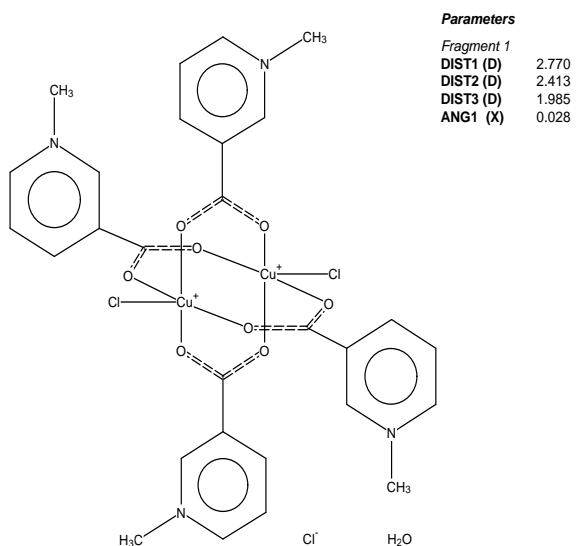

## GOLSIK

**Reference:** M.Shahid, M.Mazhar, M.Zeller, A.D.Hunter (2009) *Acta Crystallogr., Sect.E:Struct.Rep.Online* **65**,m345

**Formula:** 4(C<sub>5</sub>H<sub>14</sub>N<sub>1</sub>O<sub>1</sub><sup>1+</sup>)·C<sub>8</sub>H<sub>12</sub>Cl<sub>2</sub>Cu<sub>2</sub>O<sub>8</sub><sup>2-</sup>·2(Cl<sup>-</sup>)<sub>1</sub>

**Compound Name:** tetrakis((3-hydroxypropyl)dimethylammonium) tetrakis(μ<sub>2</sub>-acetato)-dichloro-di-copper(ii) dichloride

**Space Group:** P2<sub>1</sub>/c **Cell:** a 11.438(3) b 11.266(3) c 16.876(4)  
**Space Group No.:** 14 **(Å, °)** α 90.00 β 97.94(0) γ 90.00

**R-Factor (%):** 3.61 **Temperature(K):** 100 **Density(g/cm<sup>3</sup>):** 1.421

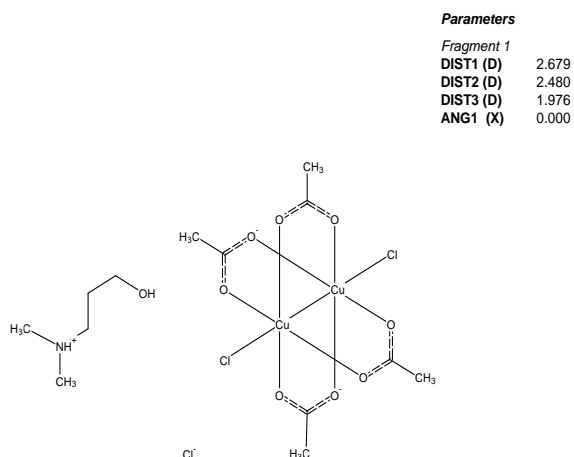

## HEMPAQ

**Reference:** J.Jezierska, T.Glowiak, A.Ozarowski, Y.V.Yablokov, Z.Rzaczynska (1998) *Inorg.Chim.Acta* **275**,28

**Formula:** C<sub>12</sub>H<sub>28</sub>Cl<sub>2</sub>Cu<sub>2</sub>N<sub>4</sub>O<sub>8</sub><sup>2+</sup>·2(Cl<sup>-</sup>)<sub>1</sub>·H<sub>2</sub>O<sub>1</sub>

**Compound Name:** tetrakis(μ<sub>2</sub>-β-Alanine)-dichloro-di-copper(ii) dichloride monohydrate

**Space Group:** P-1 **Cell:** a 9.444(2) b 9.498(2) c 14.107(3)  
**Space Group No.:** 2 **(Å, °)** α 104.04(3) β 105.90(3) γ 97.15(3)

**R-Factor (%):** 3.41 **Temperature(K):** 295 **Density(g/cm<sup>3</sup>):** 1.849

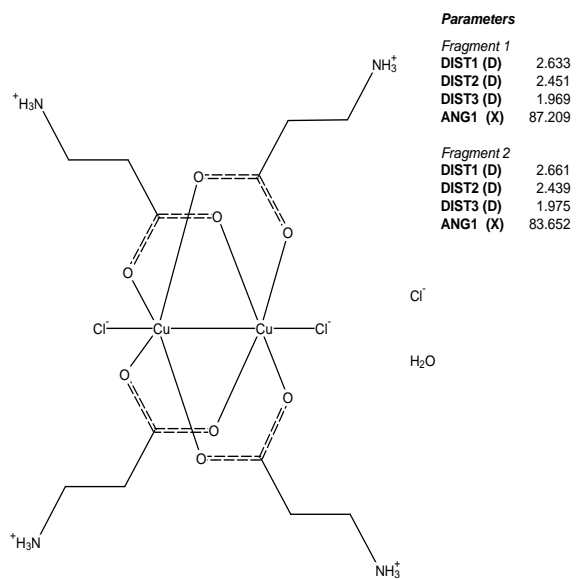

## HIYSIR

**Reference:** Xiao-Ming Chen, Xiao-Long Feng, Zhi-Tao Xu, Xiao-Hong Zhang, Feng Xue, T.C.W.Mak (1998) *Polyhedron* **17**,2639

**Formula:** C<sub>32</sub>H<sub>36</sub>Cl<sub>2</sub>Cu<sub>2</sub>N<sub>4</sub>O<sub>8</sub><sup>2+</sup>·2(Cl<sup>-</sup>)<sub>1</sub>·O<sub>4</sub><sup>1-</sup>

**Compound Name:** tetrakis(μ<sub>2</sub>-Pyridiniopropionato)-dichloro-di-copper(ii) diperchlorate

**Space Group:** Pbc<sub>a</sub> **Cell:** a 15.319(3) b 13.415(2) c 19.391(2)  
**Space Group No.:** 61 **(Å, °)** α 90.00 β 90.00 γ 90.00

**R-Factor (%):** 5.10 **Temperature(K):** 295 **Density(g/cm<sup>3</sup>):** 1.669

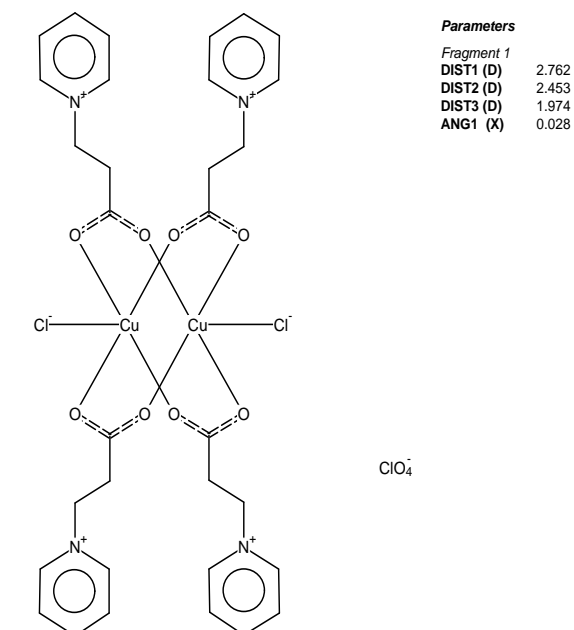

# Search: search5 (Sun Aug 20 15:58:38 2017): Hits 5-8

## IHAQAJ

**Reference:** M.R.Silva, J.A.Paixao, A.M.Beja, L.A.da Veiga, J.Martin-Gil (2001) *J.Chem.Cryst.* **31**,167

**Formula:**  $C_{20}H_{44}Cl_2Cu_2N_4O_8^{2+} \cdot 2(Cl_1^{-}) \cdot 4(H_2O_1)$

**Compound Name:** tetrakis( $\mu_2$ -Trimethylammonioacetato-O,O')-dichloro-di-copper(ii) dichloride tetrahydrate

**Synonym:** tetrakis( $\mu_2$ -Betaine-O,O')-dichloro-di-copper(ii) dichloride tetrahydrate

**Space Group:** P21/c **Cell:** a 11.051(1) b 14.714(4) c 11.162(1)  
**Space Group No.:** 14 **(Å, °)**  $\alpha$  90.00  $\beta$  107.40(2)  $\gamma$  90.00

**R-Factor (%):** 3.03 **Temperature(K):** 293 **Density(g/cm<sup>3</sup>):** 1.552

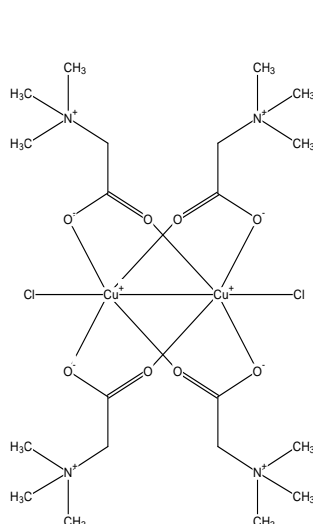

**Parameters**

Fragment 1

|           |        |
|-----------|--------|
| DIST1 (D) | 2.766  |
| DIST2 (D) | 2.418  |
| DIST3 (D) | 1.968  |
| ANG1 (X)  | 86.249 |

Cl<sup>-</sup>  
H<sub>2</sub>O

## MENQUR

**Reference:** H.Ackermann, B.Neumuller, K.Dehnicke (2000) *Z.Anorg.Allg.Chem.* **626**,1712

**Formula:**  $2(C_8H_{19}N_1O_1P_1^{1+}) \cdot C_8H_{12}Cl_2Cu_2O_8^{2-} \cdot 4(C_1H_2Cl_2)$

**Compound Name:** bis(N-Acetyltriethylphosphaneiminium) tetrakis( $\mu_2$ -acetato)-dichloro-di-copper(ii) dichloromethane solvate

**Space Group:** P21/n **Cell:** a 7.941(1) b 23.569(6) c 13.273(2)  
**Space Group No.:** 14 **(Å, °)**  $\alpha$  90.00  $\beta$  91.00(1)  $\gamma$  90.00

**R-Factor (%):** 5.97 **Temperature(K):** 203 **Density(g/cm<sup>3</sup>):** 1.506

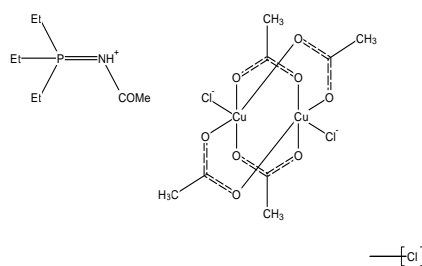

**Parameters**

Fragment 1

|           |       |
|-----------|-------|
| DIST1 (D) | 2.687 |
| DIST2 (D) | 2.465 |
| DIST3 (D) | 1.977 |
| ANG1 (X)  | 0.000 |

[Cl]<sub>2</sub>

## QEWYAT

**Reference:** L.Wiehl, J.Schreuer, A.Stojic (2006) *Z.Kristallogr.-New Cryst.Struct.* **221**,527

**Formula:**  $C_{20}H_{44}Br_2Cu_2N_4O_8^{2+} \cdot 2(Br_1^{-}) \cdot 2(H_2O_1)$

**Compound Name:** tetrakis( $\mu_2$ -Betaine-O,O')-dibromo-di-copper(ii) dibromide dihydrate

**Space Group:** P21/c **Cell:** a 11.304(0) b 14.766(0) c 11.324(0)  
**Space Group No.:** 14 **(Å, °)**  $\alpha$  90.00  $\beta$  108.19(0)  $\gamma$  90.00

**R-Factor (%):** 3.23 **Temperature(K):** 293 **Density(g/cm<sup>3</sup>):** 1.759

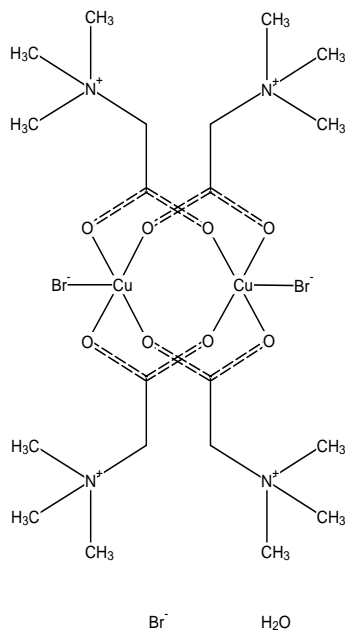

**Parameters**

Fragment 1

|           |       |
|-----------|-------|
| DIST1 (D) | 2.768 |
| DIST2 (D) | 2.556 |
| DIST3 (D) | 1.977 |
| ANG1 (X)  | 0.034 |

Br<sup>-</sup> H<sub>2</sub>O

## QEWYEX

**Reference:** J.Schreuer, L.Wiehl, J.Biehler, P.Hofmann (2006) *Z.Kristallogr.-New Cryst.Struct.* **221**,529

**Formula:**  $C_{20}H_{44}Br_2Cu_2N_4O_8^{2+} \cdot Br_4Cu_1^2 \cdot 2H_2O_1$

**Compound Name:** tetrakis( $\mu_2$ -Betaine-O,O')-dibromo-di-copper(ii) tetrabromo-copper(ii) monohydrate

**Space Group:** P-1 **Cell:** a 11.681(0) b 13.285(1) c 14.719(1)  
**Space Group No.:** 2 **(Å, °)**  $\alpha$  64.61(0)  $\beta$  75.23(0)  $\gamma$  74.82(0)

**R-Factor (%):** 2.95 **Temperature(K):** 293 **Density(g/cm<sup>3</sup>):** 1.955

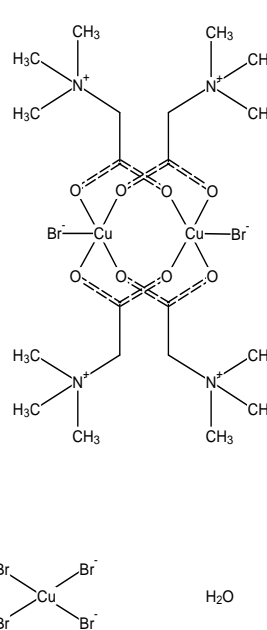

**Parameters**

Fragment 1

|           |       |
|-----------|-------|
| DIST1 (D) | 2.783 |
| DIST2 (D) | 2.563 |
| DIST3 (D) | 1.965 |
| ANG1 (X)  | 0.000 |

Fragment 2

|           |       |
|-----------|-------|
| DIST1 (D) | 2.820 |
| DIST2 (D) | 2.529 |
| DIST3 (D) | 1.981 |
| ANG1 (X)  | 0.000 |

H<sub>2</sub>O

# Search: search5 (Sun Aug 20 15:58:38 2017): Hits 9-12

## RERTUD

**Reference:** A.Harada, M.Tsuchimoto, S.Ohba, K.Iwasawa, T.Tokii (1997) *Acta Crystallogr., Sect.B:Struct.Sci.* ,53,654

**Formula:** C<sub>32</sub> H<sub>20</sub> Cl<sub>2</sub> Cu<sub>2</sub> O<sub>12</sub> 2<sup>-</sup>·2(C<sub>7</sub> H<sub>10</sub> N<sub>1</sub> 1<sup>+</sup>)·2(C<sub>6</sub> H<sub>6</sub>)

**Compound Name:** bis(2,3-Dimethylpyridinium) tetrakis(μ<sub>2</sub>-benzoylformato-O,O')-dichloro-di-copper(ii) benzene solvate

**Space Group:** P2<sub>1</sub>/n **Cell:** a 14.332(1) b 10.855(1) c 17.719(1)  
**Space Group No.:** 14 **(Å, °)** α 90.00 β 91.00(1) γ 90.00

**R-Factor (%):** 4.76 **Temperature(K):** 295 **Density(g/cm<sup>3</sup>):** 1.406

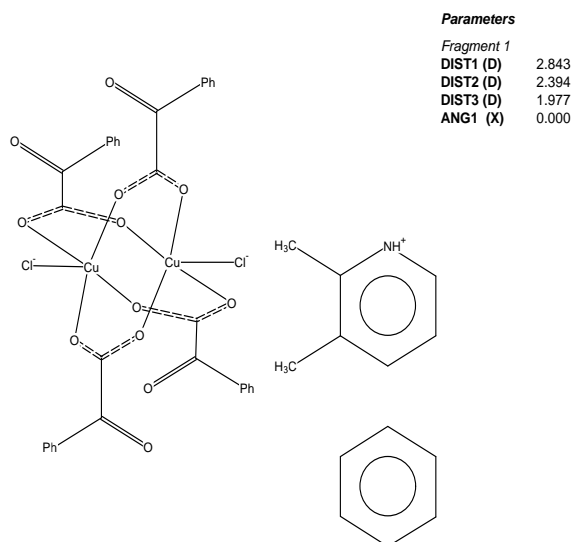

## SAPDET

**Reference:** N.Lah, I.Leban (2005) *Acta Crystallogr., Sect.E:Struct.Rep.Online* ,61,m835

**Formula:** C<sub>24</sub> H<sub>52</sub> Cl<sub>2</sub> Cu<sub>2</sub> N<sub>4</sub> O<sub>8</sub> 2<sup>+</sup>·2(Cl<sub>1</sub> 1<sup>-</sup>)·4(H<sub>2</sub> O<sub>1</sub>)

**Compound Name:** tetrakis(μ<sub>2</sub>-6-Ammoniohexanoato-O,O')-bis(chloro-copper(ii)) dichloride tetrahydrate

**Space Group:** P2<sub>1</sub>/n **Cell:** a 9.412(0) b 12.185(0) c 17.585(0)  
**Space Group No.:** 14 **(Å, °)** α 90.00 β 105.44(0) γ 90.00

**R-Factor (%):** 3.60 **Temperature(K):** 150 **Density(g/cm<sup>3</sup>):** 1.479

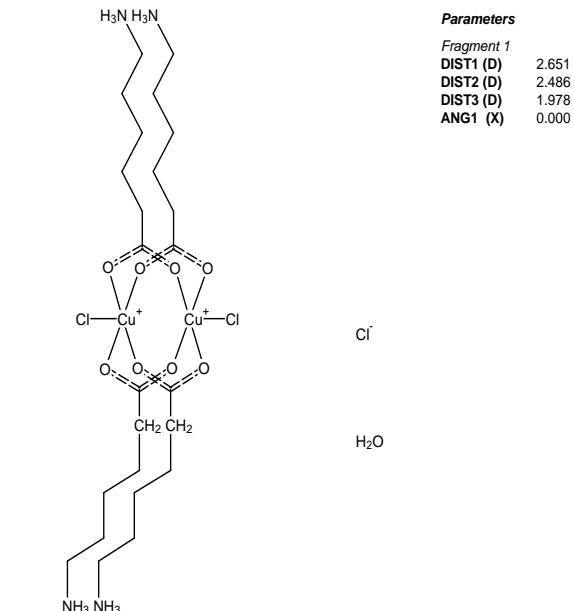

## SASVOY

**Reference:** M.R.Silva, A.M.Beja, J.A.Paixao, J.Martin-Gil (2005) *Acta Crystallogr., Sect.C:Cryst.Struct.Commun.* ,61,m380

**Formula:** C<sub>16</sub> H<sub>36</sub> Cl<sub>8</sub> Cu<sub>4</sub> N<sub>4</sub> O<sub>8</sub>

**Compound Name:** bis(μ<sub>2</sub>-Chloro)-hexachloro-tetrakis(μ<sub>2</sub>-dimethylglycine-O,O')-tetra-copper(ii)

**Space Group:** P2<sub>1</sub>/c **Cell:** a 9.759(1) b 12.861(1) c 14.060(1)  
**Space Group No.:** 14 **(Å, °)** α 90.00 β 99.20(3) γ 90.00

**R-Factor (%):** 2.35 **Temperature(K):** 293 **Density(g/cm<sup>3</sup>):** 1.812

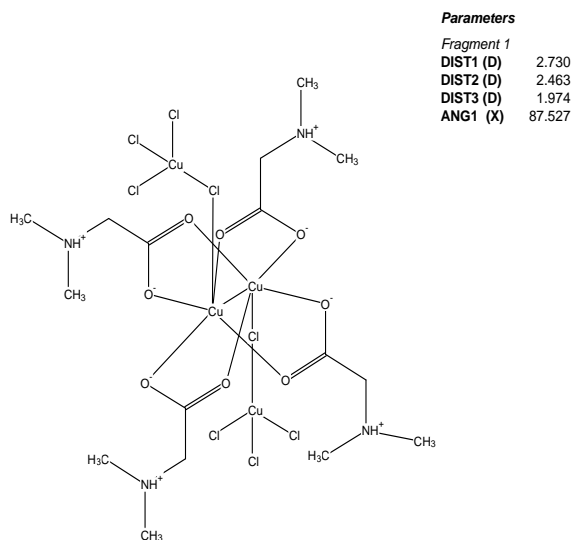

## WEXHOW

**Reference:** V.Kh.Sabirov, N.M.Kebets, M.A.Porai-Koshits, Yu.T.Struchkov (1994) *Koord.Khim.(Russ.)(Coord.Chem.)* ,20,466

**Formula:** C<sub>16</sub> H<sub>36</sub> Cl<sub>2</sub> Cu<sub>2</sub> N<sub>4</sub> O<sub>8</sub> 2<sup>+</sup>·2(Cl<sub>1</sub> 1<sup>-</sup>)·3(H<sub>2</sub> O<sub>1</sub>)

**Compound Name:** tetrakis(μ<sub>2</sub>-γ-Ammoniobutyrato-O,O')-dichloro-di-copper(ii) dichloride trihydrate

**Space Group:** P2<sub>1</sub> **Cell:** a 11.935(4) b 9.069(3) c 14.276(3)  
**Space Group No.:** 4 **(Å, °)** α 90.00 β 101.37(2) γ 90.00

**R-Factor (%):** 4.70 **Temperature(K):** 295 **Density(g/cm<sup>3</sup>):** 1.612

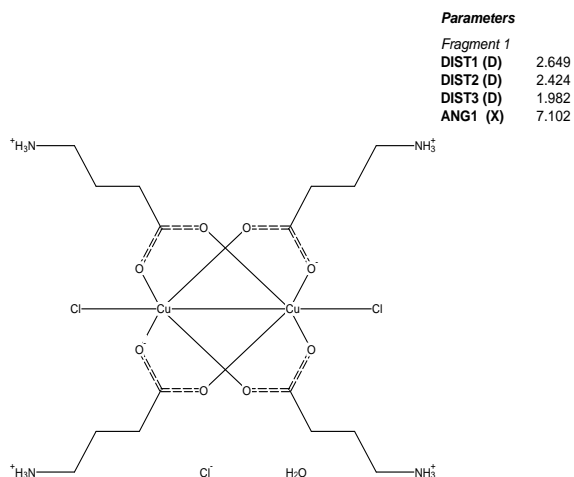

# Search: search5 (Sun Aug 20 15:58:38 2017): Hits 13-16

## WUFMIU

**Reference:** Rui-Bo Xu, Xing-You Xu, Ming-Yan Wang, Xu-Jie Yang, Xin Wang, Lu-De Lu, Wei-Xing Ma (2009) *Jiegou Huaxue(Chin. J.Chin. J.Struct.Chem.)*, **28**,703

**Formula:**  $C_8 H_{12} Cl_2 Cu_2 O_8^{2-} \cdot 2(C_2 H_6 N_1 O_1^{1+})$

**Compound Name:** 1-Hydroxyethaniminium tetrakis( $\mu_2$ -acetato-O,O')-dichloro-di-copper(ii)

**Space Group:** P21/c **Cell:** a 8.298(1) b 14.358(2) c 12.001(0)  
**Space Group No.:** 14 **(Å, °)**  $\alpha$  90.00  $\beta$  130.62(0)  $\gamma$  90.00

**R-Factor (%):** 6.17 **Temperature(K):** 298 **Density(g/cm<sup>3</sup>):** 1.696

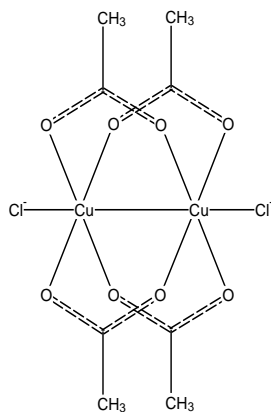

**Parameters**

Fragment 1  
**DIST1 (D)** 2.654  
**DIST2 (D)** 2.478  
**DIST3 (D)** 1.972  
**ANG1 (X)** 84.456

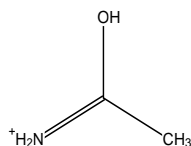

## YITGOX

**Reference:** Xiao-Ming Chen, T.C.W.Mak (1993) *Struct.Chem.*, **4**,247

**Formula:**  $C_{20} H_{44} Cl_2 Cu_2 N_4 O_8^{2+} \cdot C_{10} H_{22} Cl_2 Cu_1 N_2 O_4 \cdot 2(Cl_1^{1-})$

**Compound Name:** bis[bis( $\mu_2$ -Betainato-O,O')-chloro-copper(ii)] bis(betainato-O)-dichloro-copper(ii) dichloride

**Space Group:** C2/c **Cell:** a 30.100 b 13.533 c 11.710  
**Space Group No.:** 15 **(Å, °)**  $\alpha$  90.00  $\beta$  103.78  $\gamma$  90.00

**R-Factor (%):** 4.00 **Temperature(K):** 295 **Density(g/cm<sup>3</sup>):** 1.586

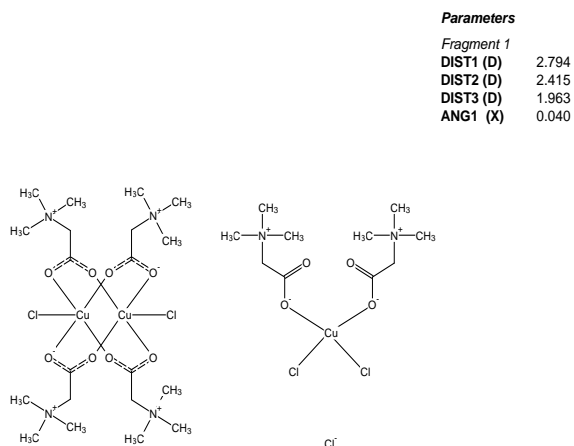

**Parameters**

Fragment 1  
**DIST1 (D)** 2.794  
**DIST2 (D)** 2.415  
**DIST3 (D)** 1.963  
**ANG1 (X)** 0.040

## YITGUD

**Reference:** Xiao-Ming Chen, T.C.W.Mak (1993) *Struct.Chem.*, **4**,247

**Formula:**  $3(C_{28} H_{28} Cl_2 Cu_2 N_4 O_8^{2+}) \cdot 2(Cl_4 Cu_1^{2-}) \cdot 2(Cl_1^{1-})$

**Compound Name:** tris(tetrakis( $\mu_2$ -Pyridylbetainato-O,O')-dichloro-di-copper(ii)) bis(tetrachloro-copper(ii)) dichloride

**Space Group:** P-3 **Cell:** a 22.842 b 22.842 c 6.999  
**Space Group No.:** 147 **(Å, °)**  $\alpha$  90.00  $\beta$  90.00  $\gamma$  120.00

**R-Factor (%):** 6.80 **Temperature(K):** 295 **Density(g/cm<sup>3</sup>):** 1.429

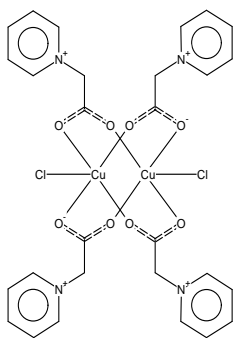

**Parameters**

Fragment 1  
**DIST1 (D)** 2.795  
**DIST2 (D)** 2.435  
**DIST3 (D)** 1.988  
**ANG1 (X)** 0.020

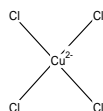

Cl<sup>-</sup>

## MATDOD

**Reference:** M.Trzebiatowska-Gusowska, A.Gagor (2017) *J.Coord.Chem.*,

**Formula:**  $C_4 H_4 Cl_2 Cu_2 O_8^{2-} \cdot C_4 H_{14} N_2^{2+}$

**Compound Name:** butane-1,4-diaminium dichloro-tetrakis( $\mu$ -formato)-di-copper(ii)

**Space Group:** P21/n **Cell:** a 7.192(0) b 11.604(0) c 9.995(0)  
**Space Group No.:** 14 **(Å, °)**  $\alpha$  90.00  $\beta$  104.20(0)  $\gamma$  90.00

**R-Factor (%):** 1.66 **Temperature(K):** 295 **Density(g/cm<sup>3</sup>):** 1.923

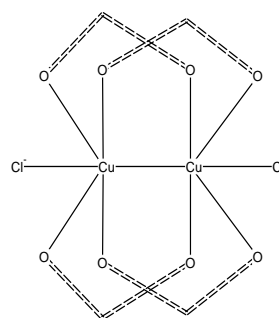

**Parameters**

Fragment 1  
**DIST1 (D)** 2.691  
**DIST2 (D)** 2.480  
**DIST3 (D)** 1.975  
**ANG1 (X)** 87.878

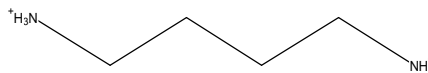

# Search: search5 (Sun Aug 20 15:58:38 2017): Hit 17

MATDUJ

**Reference:** M.Trzebiatowska-Gusowska, A.Gagor (2017)  
*J.Coord.Chem.* ,

**Formula:**  $C_4 H_4 Cl_2 Cu_2 O_8^{2-} \cdot C_3 H_{12} N_2^{2+}$

**Compound Name:** propane-1,3-diaminium dichloro-tetrakis( $\mu$ -formato)-di-copper(ii)

**Space Group:** P21/n    **Cell:**    **a** 7.031(0)    **b** 11.581(0)    **c** 9.366(0)  
**Space Group No.:** 14    ( **$\text{\AA}$** ,<sup>o</sup>)     **$\alpha$**  90.00     **$\beta$**  99.36(0)     **$\gamma$**  90.00

**R-Factor (%)**: 2.82    **Temperature(K)**: 295    **Density(g/cm<sup>3</sup>)**: 2.005

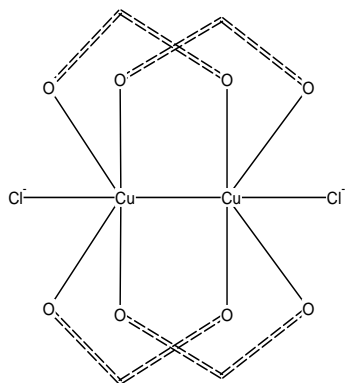

#### Parameters

**Fragment 1**  
**DIST1 (D)** 2.688  
**DIST2 (D)** 2.439  
**DIST3 (D)** 1.965  
**ANG1 (X)** 87.674

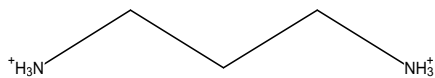

Supplement: e-73-01421-sup3.pdf [file e-73-01421-sup3.pdf]
